# Supplementary material for: Genetic Dissection of Grain Zinc, Iron, and Yield Traits in a CIMMYT Bread Wheat mapping population to Support Biofortification Breeding
Source: Research Square preprint supplement (doi:10.21203/rs.3.rs-8273495/v1), 2025-12-09
Supplement: Supplementary file 1 [file 09762cad96cd01475247bab8.xlsx]

## Sheet: Table S1
Table S1. Distribution and density statistics of SNPs across the 21 chromosomes
Chromosome ID	NumMarkers	ChromLength (cM)
1A	70	157.053
1B	132	778.912
1D	31	169.091
2A	94	487.825
2B	134	481.866
2D	38	224.486
3A	103	445.906
3B	57	334.318
3D	14	124.446
4A	59	267.441
4B	37	231.399
4D	4	91.6953
5A	79	254.688
5B	89	416.822
5D	18	110.236
6A	91	219.106
6B	10	63.6035
6D	26	196.752
7A	110	342.823
7B	58	205.473
7D	46	175.601
WholeGenome	1300	5779.54

## Sheet: Table S2
Table S2. QTL associated with DH, TKW, PH, TW, GFeC and GZnC identified through multi-environment analysis
QTLa	Trait	Chr.	Position	Marker	LOD	LOD(A)	LOD(AbyE)	PVEb	PVE(A)	PVE(AbyE)	Addc	AbyE_01	AbyE_02	CId
QDH.cim-1B.1*	DH	1B	117	5581845-1231437	9.7561	9.7488	0.0072	6.4273	5.21	1.2172	-1.056	-0.5104	0.5104	113.5-120.5
QDH.cim-1B.2	DH	1B	322	1165956-3950179_2	3.5563	3.2048	0.3514	1.5171	1.4454	0.0717	0.5287	0.1178	-0.1178	316.5-332.5
QDH.cim-1B.3*	DH	1B	478	7351355-6041268_1	6.1478	6.1389	0.0089	3.6494	2.9429	0.7065	0.7658	0.3752	-0.3752	468.5-488.5
QDH.cim-1B.4	DH	1B	623	100025202-100032473_2	2.591	2.3258	0.2652	1.3498	1.3027	0.0471	-0.5049	-0.096	0.096	597.5-641.5
QDH.cim-1D	DH	1D	2	1061093-1163766	3.4804	3.3946	0.0858	1.6946	1.4934	0.2012	0.5372	0.1972	-0.1972	0-9.5
QDH.cim-2A.1	DH	2A	1	1127156-1022282	2.8269	2.3162	0.5107	1.0405	1.0291	0.0114	0.4848	0.0511	-0.0511	0-5.5
QDH.cim-2A.2*	DH	2A	446	1166608-1862554	6.8652	6.4308	0.4344	3.5984	3.3256	0.2728	-0.8017	-0.2296	0.2296	441.5-449.5
QDH.cim-2B.1*	DH	2B	396	1235593-1255765	4.8376	4.824	0.0137	2.9913	2.5263	0.465	0.7001	0.3003	-0.3003	382.5-405.5
QDH.cim-2B.2	DH	2B	432	1025662-1027874	3.5941	3.4185	0.1756	1.7264	1.5821	0.1443	0.5531	0.167	-0.167	429.5-435.5
QDH.cim-2D	DH	2D	198	1064566-1111492	4.1528	3.8417	0.311	2.0143	1.8952	0.1191	-0.6061	-0.152	0.152	194.5-201.5
QDH.cim-3A.1	DH	3A	305	1113022-4989110	2.535	2.3245	0.2105	1.0891	1.0268	0.0622	-0.4455	-0.1097	0.1097	302.5-306.5
QDH.cim-3A.2	DH	3A	325	1190017-1059616	3.9266	3.689	0.2376	1.7539	1.6198	0.134	-0.5766	-0.1659	0.1659	323.5-327.5
QDH.cim-3B.1	DH	3B	39	2285289-5324164	3.4172	3.3459	0.0713	1.7242	1.5167	0.2075	-0.5415	-0.2003	0.2003	26.5-42.5
QDH.cim-3B.2	DH	3B	149	3024710-1103476	3.165	3.1433	0.0218	1.6323	1.3762	0.2561	0.5189	0.2239	-0.2239	146.5-153.5
QDH.cim-4B	DH	4B	94	1228144-989303_2	2.623	2.5853	0.0378	1.326	1.1449	0.1811	-0.4705	-0.1871	0.1871	88.5-96.5
QDH.cim-5B*	DH	5B	57	1025982-4991398	49.5632	45.4925	4.0707	36.0966	30.6119	5.4847	2.4346	1.0305	-1.0305	56.5-57.5
QDH.cim-5D.1	DH	5D	74	100030287-1093565	2.6162	2.3946	0.2216	1.2877	1.2263	0.0614	-0.4942	-0.1106	0.1106	59.5-79.5
QDH.cim-5D.2	DH	5D	91	2255530-1126619	2.6225	2.5145	0.108	1.41	1.2988	0.1112	-0.5052	-0.1478	0.1478	83.5-101.5
QDH.cim-6B	DH	6B	63	1159475-7930475	2.8265	2.0451	0.7814	0.9621	0.9621	0	0.4998	-0.0027	0.0027	58.5-63
QDH.cim-7D*	DH	7D	126	1128052-1091583	23.2601	20.8139	2.4462	20.5711	11.121	9.4501	-1.5653	-1.4429	1.4429	124.5-126.5
QGFeC.cim-1B	GFeC	1B	729	1104117-100031865	3.389	1.7369	1.6521	2.8663	1.9348	0.9315	0.2734	-0.1897	0.1897	720.5-731.5
QGFeC.cim-2B*	GFeC	2B	437	2257519-1229520	6.2986	2.8915	3.4072	5.4707	3.2841	2.1866	-0.3547	0.2894	-0.2894	436.5-439.5
QGFeC.cim-5A.1	GFeC	5A	110	1250973-1105485	3.0564	1.199	1.8574	2.5622	1.3423	1.2199	-0.23	0.2193	-0.2193	107.5-113.5
QGFeC.cim-5A.2*	GFeC	5A	208	1694855-1294255	4.1351	3.511	0.6241	5.9952	4.0438	1.9514	-0.3928	-0.2729	0.2729	207.5-209.5
QGFeC.cim-6A*	GFeC	6A	172	4993620-1097411	10.1763	9.8145	0.3618	11.7002	11.5979	0.1023	-0.6661	-0.0626	0.0626	170.5-172.5
QGFeC.cim-6D	GFeC	6D	173	1205177-1002944	3.6955	1.3817	2.3138	3.1107	1.5448	1.5659	-0.2485	0.2502	-0.2502	162.5-179.5
QGFeC.cim-7A*	GFeC	7A	45	1093543-1001748	4.2679	4.2533	0.0146	5.43	4.8104	0.6196	-0.4346	-0.156	0.156	44.5-45.5
QGZnC.cim-1B*	GZnC	1B	320	2297564-3025967	7.0603	6.1873	0.8729	6.6921	6.3823	0.3097	-1.0672	0.2351	-0.2351	313.5-321.5
QGZnC.cim-2B.1	GZnC	2B	118	1717694-992759	3.1974	2.7849	0.4125	2.9575	2.8325	0.125	-0.7167	0.1505	-0.1505	117.5-119.5
QGZnC.cim-2B.2	GZnC	2B	433	1025662-1027874	4.1283	3.5852	0.5431	3.8813	3.6994	0.1819	-0.812	0.1801	-0.1801	432.5-433.5
QGZnC.cim-3D	GZnC	3D	124	1028015-2335071	2.7615	2.7511	0.0104	2.8836	2.718	0.1656	0.6964	0.1719	-0.1719	117.5-124
QGZnC.cim-4D	GZnC	4D	3	1703090-2265406	3.1449	3.021	0.124	3.0026	3.0026	0	0.7316	-0.0012	0.0012	0-18.5
QGZnC.cim-5B*	GZnC	5B	226	1064017-7351248	4.5625	4.5612	0.0013	4.8677	4.6586	0.2091	1.0962	0.2323	-0.2323	222.5-230.5
QGZnC.cim-7A.1	GZnC	7A	87	100011834-1011929	3.86	2.3079	1.5521	4.8847	2.3798	2.5049	0.67	0.6874	-0.6874	86.5-87.5
QGZnC.cim-7A.2	GZnC	7A	241	1085712-1202880	3.7449	3.1298	0.6151	3.4276	3.2086	0.219	0.7581	-0.1981	0.1981	238.5-256.5
QGZnC.cim-7D*	GZnC	7D	124	1128052-1091583	7.2927	7.0362	0.2565	8.4274	7.2219	1.2055	1.1927	0.4873	-0.4873	119.5-126.5
QPH.cim-1B	PH	1B	778	100036570-1041416	6.537	2.4366	4.1005	6.1166	2.4372	3.6794	-0.5998	-0.737	0.737	777.5-778
QPH.cim-1D.1*	PH	1D	0	1061787-1061093	5.3848	4.3135	1.0713	5.0951	4.3619	0.7331	-0.7844	-0.3216	0.3216	0-0.5
QPH.cim-1D.2	PH	1D	73	1098918-2278931	4.462	2.0136	2.4484	4.017	2.0226	1.9944	-0.5374	-0.5337	0.5337	70.5-81.5
QPH.cim-2B.1	PH	2B	161	1117353-1863466	13.9944	9.3912	4.6031	14.4064	9.8404	4.566	-1.1937	-0.8131	0.8131	160.5-161.5
QPH.cim-2B.2	PH	2B	431	1025662-1027874	3.2371	2.6838	0.5533	3.6611	2.6998	0.9613	-0.6171	0.3682	-0.3682	430.5-433.5
QPH.cim-4A	PH	4A	179	1864821-4911028	9.6704	6.042	3.6284	9.4863	6.1863	3.3	0.9376	0.6848	-0.6848	178.5-179.5
QPH.cim-4B*	PH	4B	102	3533506-4911133	4.4857	4.182	0.3037	4.9826	4.2293	0.7533	-0.777	0.3279	-0.3279	101.5-103.5
QPH.cim-5A	PH	5A	46	2259550-2266746	4.9956	2.0033	2.9923	5.6005	1.9134	3.687	0.5222	-0.7249	0.7249	41.5-48.5
QPH.cim-6A*	PH	6A	146	988239_2-4993395	6.2862	3.9626	2.3235	7.449	3.9924	3.4566	-0.7576	0.7049	-0.7049	145.5-147.5
QPH.cim-7B	PH	7B	175	1106053-3222549	3.6412	2.2598	1.3814	4.2321	2.2748	1.9573	-0.6219	0.5769	-0.5769	173.5-177.5
QTKW.cim-1B.1	TKW	1B	539	14924994-100031587	4.6598	2.8388	1.821	2.4438	1.9002	0.5437	0.4995	-0.2672	0.2672	538.5-539.5
QTKW.cim-1B.2	TKW	1B	657	5323509-100029938	7.7332	3.1832	4.55	3.9586	2.012	1.9465	0.5158	-0.5073	0.5073	650.5-657.5
QTKW.cim-1D.1*	TKW	1D	1	1061093-1163766	9.3657	9.0186	0.3471	7.1017	5.7221	1.3795	-0.8636	-0.424	0.424	0-5.5
QTKW.cim-1D.2	TKW	1D	65	1257036-5971263_2	3.3607	3.2337	0.127	1.9628	1.9585	0.0043	0.5073	0.0239	-0.0239	62.5-69.5
QTKW.cim-2B.1	TKW	2B	120	992759-100033126	5.9016	4.6192	1.2824	3.1691	2.8843	0.2848	-0.6162	0.1936	-0.1936	119.5-120.5
QTKW.cim-2B.2	TKW	2B	429	1105975-100032526	12.9093	6.0161	6.8932	6.9916	3.9158	3.0758	-0.7144	0.6332	-0.6332	427.5-429.5
QTKW.cim-2B.3*	TKW	2B	434	100011665-2257519	4.8342	4.0363	0.7979	3.7616	2.5559	1.2057	-0.5774	-0.3966	0.3966	433.5-436.5
QTKW.cim-2D	TKW	2D	3	1009541-1036734	9.6827	7.583	2.0997	8.1239	4.8626	3.2613	0.8038	0.6583	-0.6583	2.5-4.5
QTKW.cim-3A*	TKW	3A	291	1088933-3025190	7.7539	7.4866	0.2674	5.7844	4.731	1.0533	0.7863	0.371	-0.371	287.5-292.5
QTKW.cim-3B	TKW	3B	121	100024621-100023731	2.6306	2.5313	0.0993	1.6691	1.6657	0.0034	1.4229	0.0639	-0.0639	120.5-121.5
QTKW.cim-3D	TKW	3D	124	1028015-2335071	3.1501	3.1451	0.005	1.9589	1.8832	0.0757	0.496	0.0994	-0.0994	113.5-124
QTKW.cim-5A.1	TKW	5A	78	1207347-1228444	3.1005	2.9801	0.1205	1.7915	1.788	0.0035	-0.4827	-0.0213	0.0213	73.5-82.5
QTKW.cim-5A.2*	TKW	5A	209	1294255-3573393	14.1434	10.9998	3.1436	8.4016	7.307	1.0947	-0.9771	0.3782	-0.3782	208.5-209.5
QTKW.cim-6A	TKW	6A	198	4993807-1229728	13.4023	7.0381	6.3643	7.374	4.5247	2.8493	-0.8025	0.6369	-0.6369	194.5-200.5
QTKW.cim-6D*	TKW	6D	34	1079192-100024440	5.3415	3.7758	1.5656	4.21	2.3392	1.8708	-0.5728	-0.5123	0.5123	32.5-36.5
QTKW.cim-7B.1	TKW	7B	173	6026809-1296648	5.4443	4.312	1.1323	2.9112	2.6734	0.2378	-0.6382	0.1903	-0.1903	171.5-173.5
QTKW.cim-7B.2*	TKW	7B	200	100016517-1117714_1	13.2944	13.2407	0.0537	10.0186	9.0071	1.0116	-1.1457	-0.3839	0.3839	197.5-202.5
QTKW.cim-7D.1	TKW	7D	127	1125802-2249991	7.0216	4.6971	2.3246	5.7349	2.9516	2.7833	0.6632	0.644	-0.644	126.5-127.5
QTKW.cim-7D.2*	TKW	7D	147	4910784-1007981	10.8445	10.6636	0.1809	7.059	6.9703	0.0888	0.9536	0.1076	-0.1076	146.5-147.5
QTW.cim-2B	TW	2B	245	100029893-5410763	4.8495	0.6345	4.2151	1.6531	1.5925	0.0606	-0.2095	0.0409	-0.0409	243.5-246.5
QTW.cim-2D.1	TW	2D	135	4993517-5366919	5.1721	1.1396	4.0325	2.5861	2.5803	0.0058	-0.262	-0.0124	0.0124	133.5-145.5
QTW.cim-2D.2	TW	2D	195	2244380-1064566	2.9308	0.5331	2.3977	1.2271	1.2259	0.0012	0.183	-0.0058	0.0058	192.5-198.5
QTW.cim-3A	TW	3A	325	1190017-1059616	5.4983	1.3754	4.1228	3.1445	3.1026	0.0419	0.2959	0.0344	-0.0344	323.5-326.5
QTW.cim-5B	TW	5B	387	1142848-100007207	12.2184	1.9032	10.3152	4.2837	4.0303	0.2533	0.3371	-0.0845	0.0845	383.5-390.5
a *, QTL co-localized by both ICIM-ADD and Met methods.
b PVE, Phenotypic variance explained of the corresponding QTL.
c Positive additive effects indicate additive contributions from parent Kachu, while negative additive effects indicate additive contributions from parent Manku.
d CI, confidence interval.

## Sheet: Table S3
Table S3. Flanking markers and sequence information of the 23 QTLs.
QTL	Maker	Sequence marker
QDH.cim-1B.1*	5581845	TGCAGATGGGGACGCGCGCGCTCGTCTACGTACCTTGGCCAGGCAGGAAGAAGCTGGGGCGGCGGTGGG
	1231437	TGCAGTCCCATGCGGCAGGGCAGGCATCCTGCTGGAGTACGGTGACCGCGCTCCCGCAGGAGTGTGCGC
QDH.cim-1B.3*	7351355	TGCAGGGCCTTATAGTTTTGACGTTAAATGGAGATGAGTTAAAACGGTGGCCGAGATCGGAAGAGCGGT
QDH.cim-1B.3*	6041268_1	TGCAGGTTTGAAAGACAGGCCGTCTAGCTGATCGTGGGTTGGCACGGTCAATTGTGGTGGATCGTGGCT
QDH.cim-2A.2*	1166608	TGCAGGTTTGAAAGACAGGCCGTCTAGCTGATCGTGGGTTGGCACGGTCAATTGTGGTGGATCGTGGCT
QDH.cim-2A.2*	1862554	TGCAGTATGCCGGAACAAAGATGGCCAATTTTTGGGTGCATCTGCGGTAATTTTTGATGGACTGGTTGA
QDH.cim-2B.1*	1235593	TGCAGGAATATAAGCTTGGAGGAATATGACTGAATATAAAGCCATTTCTAGTGTTCCAAATAGCCCGAG
QDH.cim-2B.1*	1255765	TGCAGCTGCTTTGCTAGTGACAGTGGGTGATGTTGTAGCACAGGAGAATCAGTCATGCCGACACTAAAA
QDH.cim-5B*	1025982	TGCAGGCATCCCGTAGATACTTGTCTATCTAAATACCCCACGTCCTGACAGATTACTGTGGTATTCGTC
QDH.cim-5B*	4991398	TGCAGAACACGACATCGGCTCCTGGTTCGCCTTCAGGTGGCTGCTAGATGTCGCCGAGATCGGAAGAGC
QDH.cim-7D*	1128052	TGCAGAACACGACATCGGCTCCTGGTTCGCCTTCAGGTGGCTGCTAGATGTCGCCGAGATCGGAAGAGC
QDH.cim-7D*	1091583	TGCAGGTTGGCTCTGCGGGAGGAGCACGGCGCCCATTGATCCTGCCAGTGCCGCCGCTGCCCCGCATCG
QGFeC.cim-2B*	2257519	TGCAGCAGCGGTGAATGCTGGCGGCAACGACCAAGCCCTAGTTGGAGGAGGGCGGACGGAGGAGACACT
QGFeC.cim-2B*	1229520	TGCAGCGAAAAGACAACAGAGCCATGGGTGCTGAGGGCGGGCACTGGTGGTCGGCAGAAGGCGCTGTGG
QGFeC.cim-5A.2*	1694855	TGCAGCGAAAAGACAACAGAGCCATGGGTGCTGAGGGCGGGCACTGGTGGTCGGCAGAAGGCGCTGTGG
QGFeC.cim-5A.2*	1294255	TGCAGAAGGGCAGCCACTCGCCAGTCGCTGCAAGGGGGAGGAGGGCTAACCCGTGCTGCAAGGCCGAGA
QGFeC.cim-6A*	4993620	TGCAGCTGGGAGAACTTGTCAGGCGTATTAGAAGCAATGCTCTGGAGTACGAACAGACTTTCGGGCCGA
QGFeC.cim-6A*	1097411	TGCAGAGCATGATAATAGTGCGCCCCTGCAACGGGCTCGCCACGACGGTGCAGGTGAGCTACCACGGCT
QGFeC.cim-7A*	1093543	TGCAGCTACGGAGCGATGTTTTATCCGCCGATGCCGACCCTGCCCGCGCCCCGAGATCGGAAGAGCGGT
QGFeC.cim-7A*	1001748	TGCAGCGAGAGGTTGTGCAGGGCGCCCATCAGCGCCGCGTGATCAACTCCATGAGCATTGGAGCTGGCC
QGZnC.cim-1B*	2297564	TGCAGCGAGCAGCTCCTGTCCCCTATCTTCACCGTCCTGCGCCAACCACACCAAACACGTCAGCGTGGG
QGZnC.cim-1B*	3025967	TGCAGTTTTGGGCGGTACATGACATGGCACATGATGATGGGCAGGGCAGGGCACCGACAGGGCCATGAG
QGZnC.cim-5B*	1064017	TGCAGTTTTGGGCGGTACATGACATGGCACATGATGATGGGCAGGGCAGGGCACCGACAGGGCCATGAG
QGZnC.cim-5B*	7351248	TGCAGTCAACATTCTTTGGCTACTTGATGAATGAAAGAACAAGGTTTGACTCGACCCGCTTTAATTGGT
QGZnC.cim-7D*	1128052	TGCAGATGGAACCATCCTAGTGTTTGGAAGAAGAAAAGGATTTACCTCGAGGAGAGGAACCGTGGTGTC
QGZnC.cim-7D*	1091583	TGCAGTAAATGGTAACAACACAGAGAATACAGTTTCATTGCTTGTTCGAACCGCTATGTCAATCAGGAA
QPH.cim-1D.1*	1061787	TGCAGTAAATGGTAACAACACAGAGAATACAGTTTCATTGCTTGTTCGAACCGCTATGTCAATCAGGAA
QPH.cim-1D.1*	1061093	TGCAGGGTGGCCTCGCCGGAAGAGAGCGTCGATGGCCATGGACAATGCGGAGGACGACCAGCTGGCCTC
QPH.cim-4B*	3533506	TGCAGGTCGATGCAGTCGTACAGGAAGAAGAGCTCCCGAGATCGGAAGAGCGGTTCAGCAGGAATGCCG
QPH.cim-4B*	4911133	TGCAGCAGTCTAGGGGGTTCGGTACGGAGTTCCACTTCCCGAGATCGGAAGAGCGGTTCAGCAGGAATG
QPH.cim-6A*	988239_2	TGCAGGCTACATCCCGTGTTGCCTATTCGCAGCTGGTCGAACGCGTCTTTCACGTCCGAGATCGGAAGA
QPH.cim-6A*	4993395	TGCAGGTACGCCGACGGCGTCGCCTTCGACCCCGAACCGAGATCGGAAGAGCGGTTCAGCAGGAATGCC
QTKW.cim-1D.1*	1061093	TGCAGACTTGTCGGGGGCCCAGCCGCAGTTGCTCGAGGTGGCATGGTCAACAACGGTGTTGGTGGAATG
QTKW.cim-1D.1*	1163766	TGCAGGAGGAGGAACACGTACGCGCAGATGGTGACGGCCATGATCCACACCTGGGACATGGCGTGCCCG
QTKW.cim-2B.3*	100011665	TGCAGCAAGCTAGTTCAGCGCCATCCAGCTCGCCATGGACGTGTCCGCCACCGCCCGCGGCCTCCTCCT
QTKW.cim-2B.3*	2257519	TGCAGATCCCATCTATTCTTTCCTCTCCGAGATCGGAAGAGCGGTTCAGCAGGAATGCCGAGACCGATC
QTKW.cim-3A*	1088933	TGCAGGCCCAGGGGCAGGGAGGGGGCGGCGGGGGCCCGAGATCGGAAGAGCGGTTCAGCAGGAATGCCG
QTKW.cim-3A*	3025190	TGCAGCCCCCTCGGCCATCATCGCCTCCCCTCCACTTGCCTCTCCCACTACTTCCCCACACTCGCCCCT
QTKW.cim-5A.2*	1294255	TGCAGAAGAAATTGCTAAGTCAGAACCGAGATCGGAAGAGCGGTTCAGCAGGAATGCCGAGACCGATCT
QTKW.cim-5A.2*	3573393	TGCAGCCACGAAATGATCCGAGATCGGAAGAGCGGTTCAGCAGGAATGCCGAGACCGATCTCGTATGCC
QTKW.cim-6D*	1079192	TGCAGCTCTCAGCCGCCGTCGCGTCCTTCTCCGAGATCGGAAGAGCGGTTCAGCAGGAATGCCGAGACC
QTKW.cim-6D*	100024440	TGCAGCACATCCCTTCCTTATTCCCCAAAACTGTAACTGTCGTCCACCCGAAGCTGTCACCGCCGCAGC
QTKW.cim-7B.2*	100016517	TGCAGTGTGTATGTGGAAATGTGGAATGGCACCTCACATCCATGCGTGGACCTCGCGGCGCGCAGACCC
QTKW.cim-7B.2*	1117714_1	TGCAGCGGTCCAGCGCAAGCGACCGATGGAGCATCTCCAGGACGGCCACTACGTGCGGCTGCGCAACCC
QTKW.cim-7D.2*	4910784	TGCAGATTTGGTTAAGAAAGAACGTACGCTTTCCGAGATCGGAAGAGCGGTTCAGCAGGAATGCCGAGA
QTKW.cim-7D.2*	1007981	TGCAGTTGCACTGGTTTCGGTGCTGCTGCTGAGCCTCGCGCACGGCTTGCTGGGGGCTCATGGAGCCAG
