# Supplementary material for: Genetic Dissection of Grain Zinc, Iron, and Yield Traits in a CIMMYT Bread Wheat mapping population to Support Biofortification Breeding
Source: Research Square preprint supplement (doi:10.21203/rs.3.rs-8273495/v1), 2025-12-09
Supplement: Supplementary file 2 [file 2162088a4ed84a6d52ca39d4.docx]

A

B

C

D

E

F


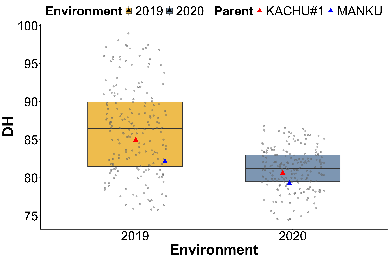

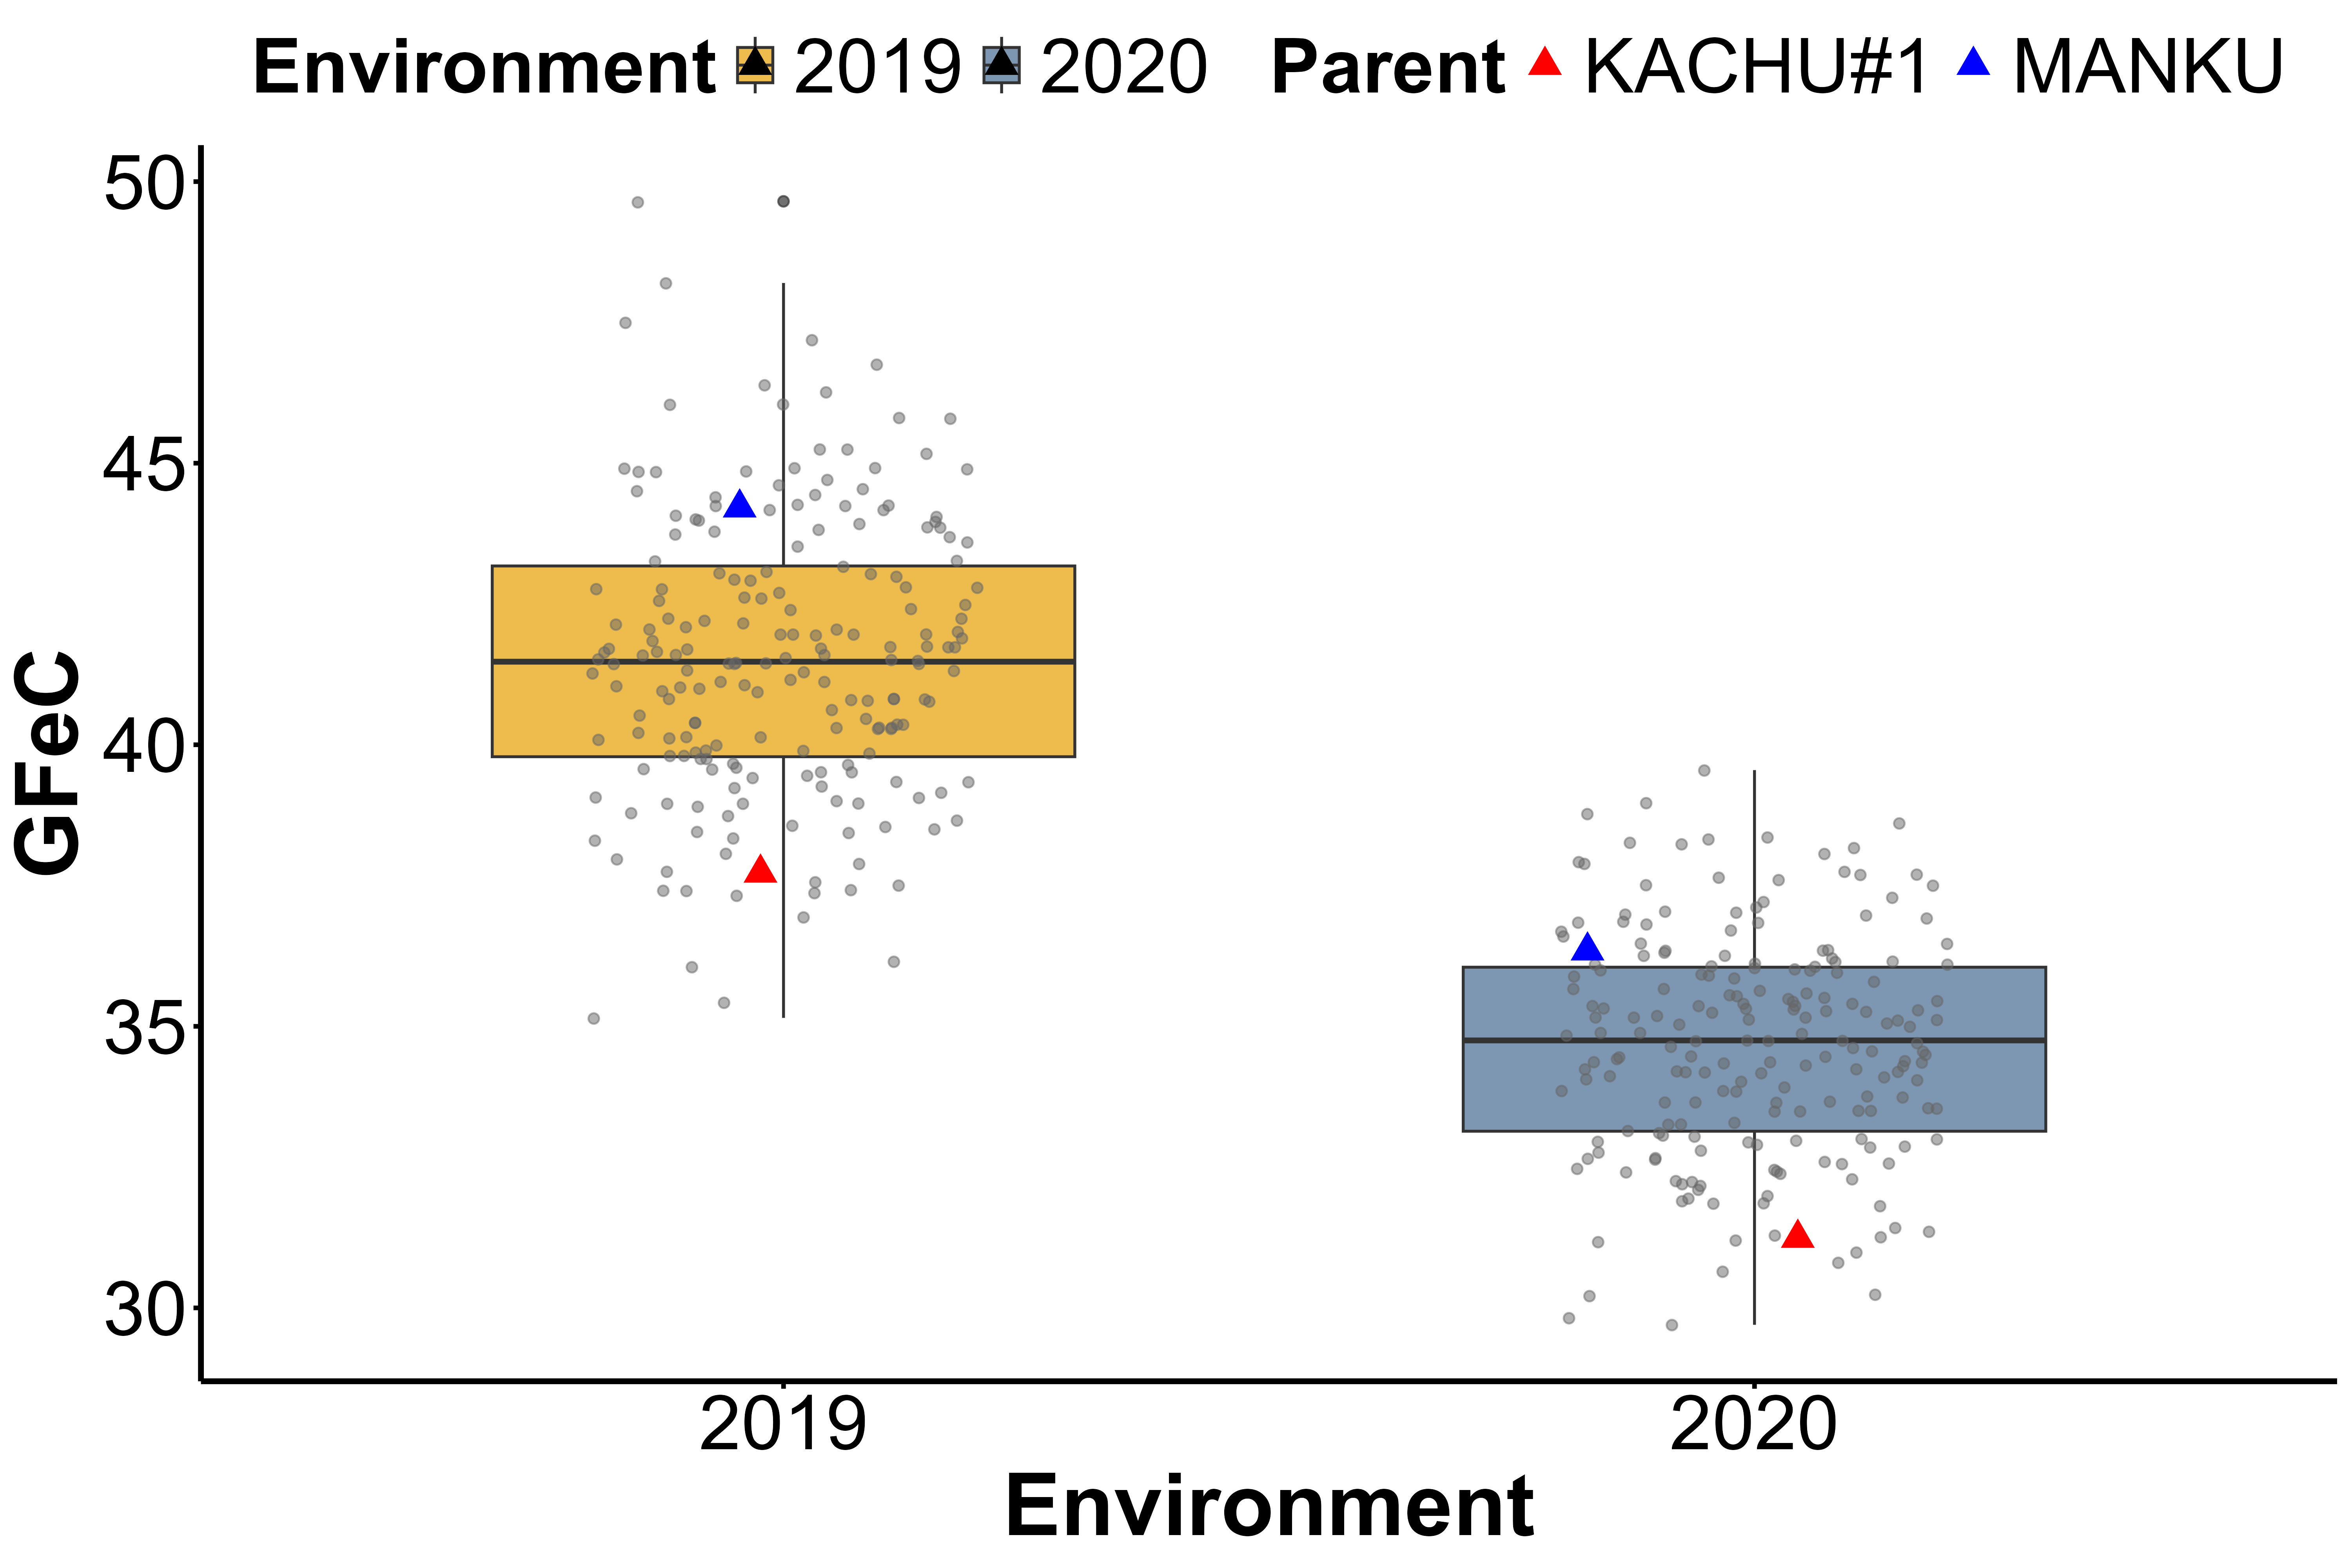

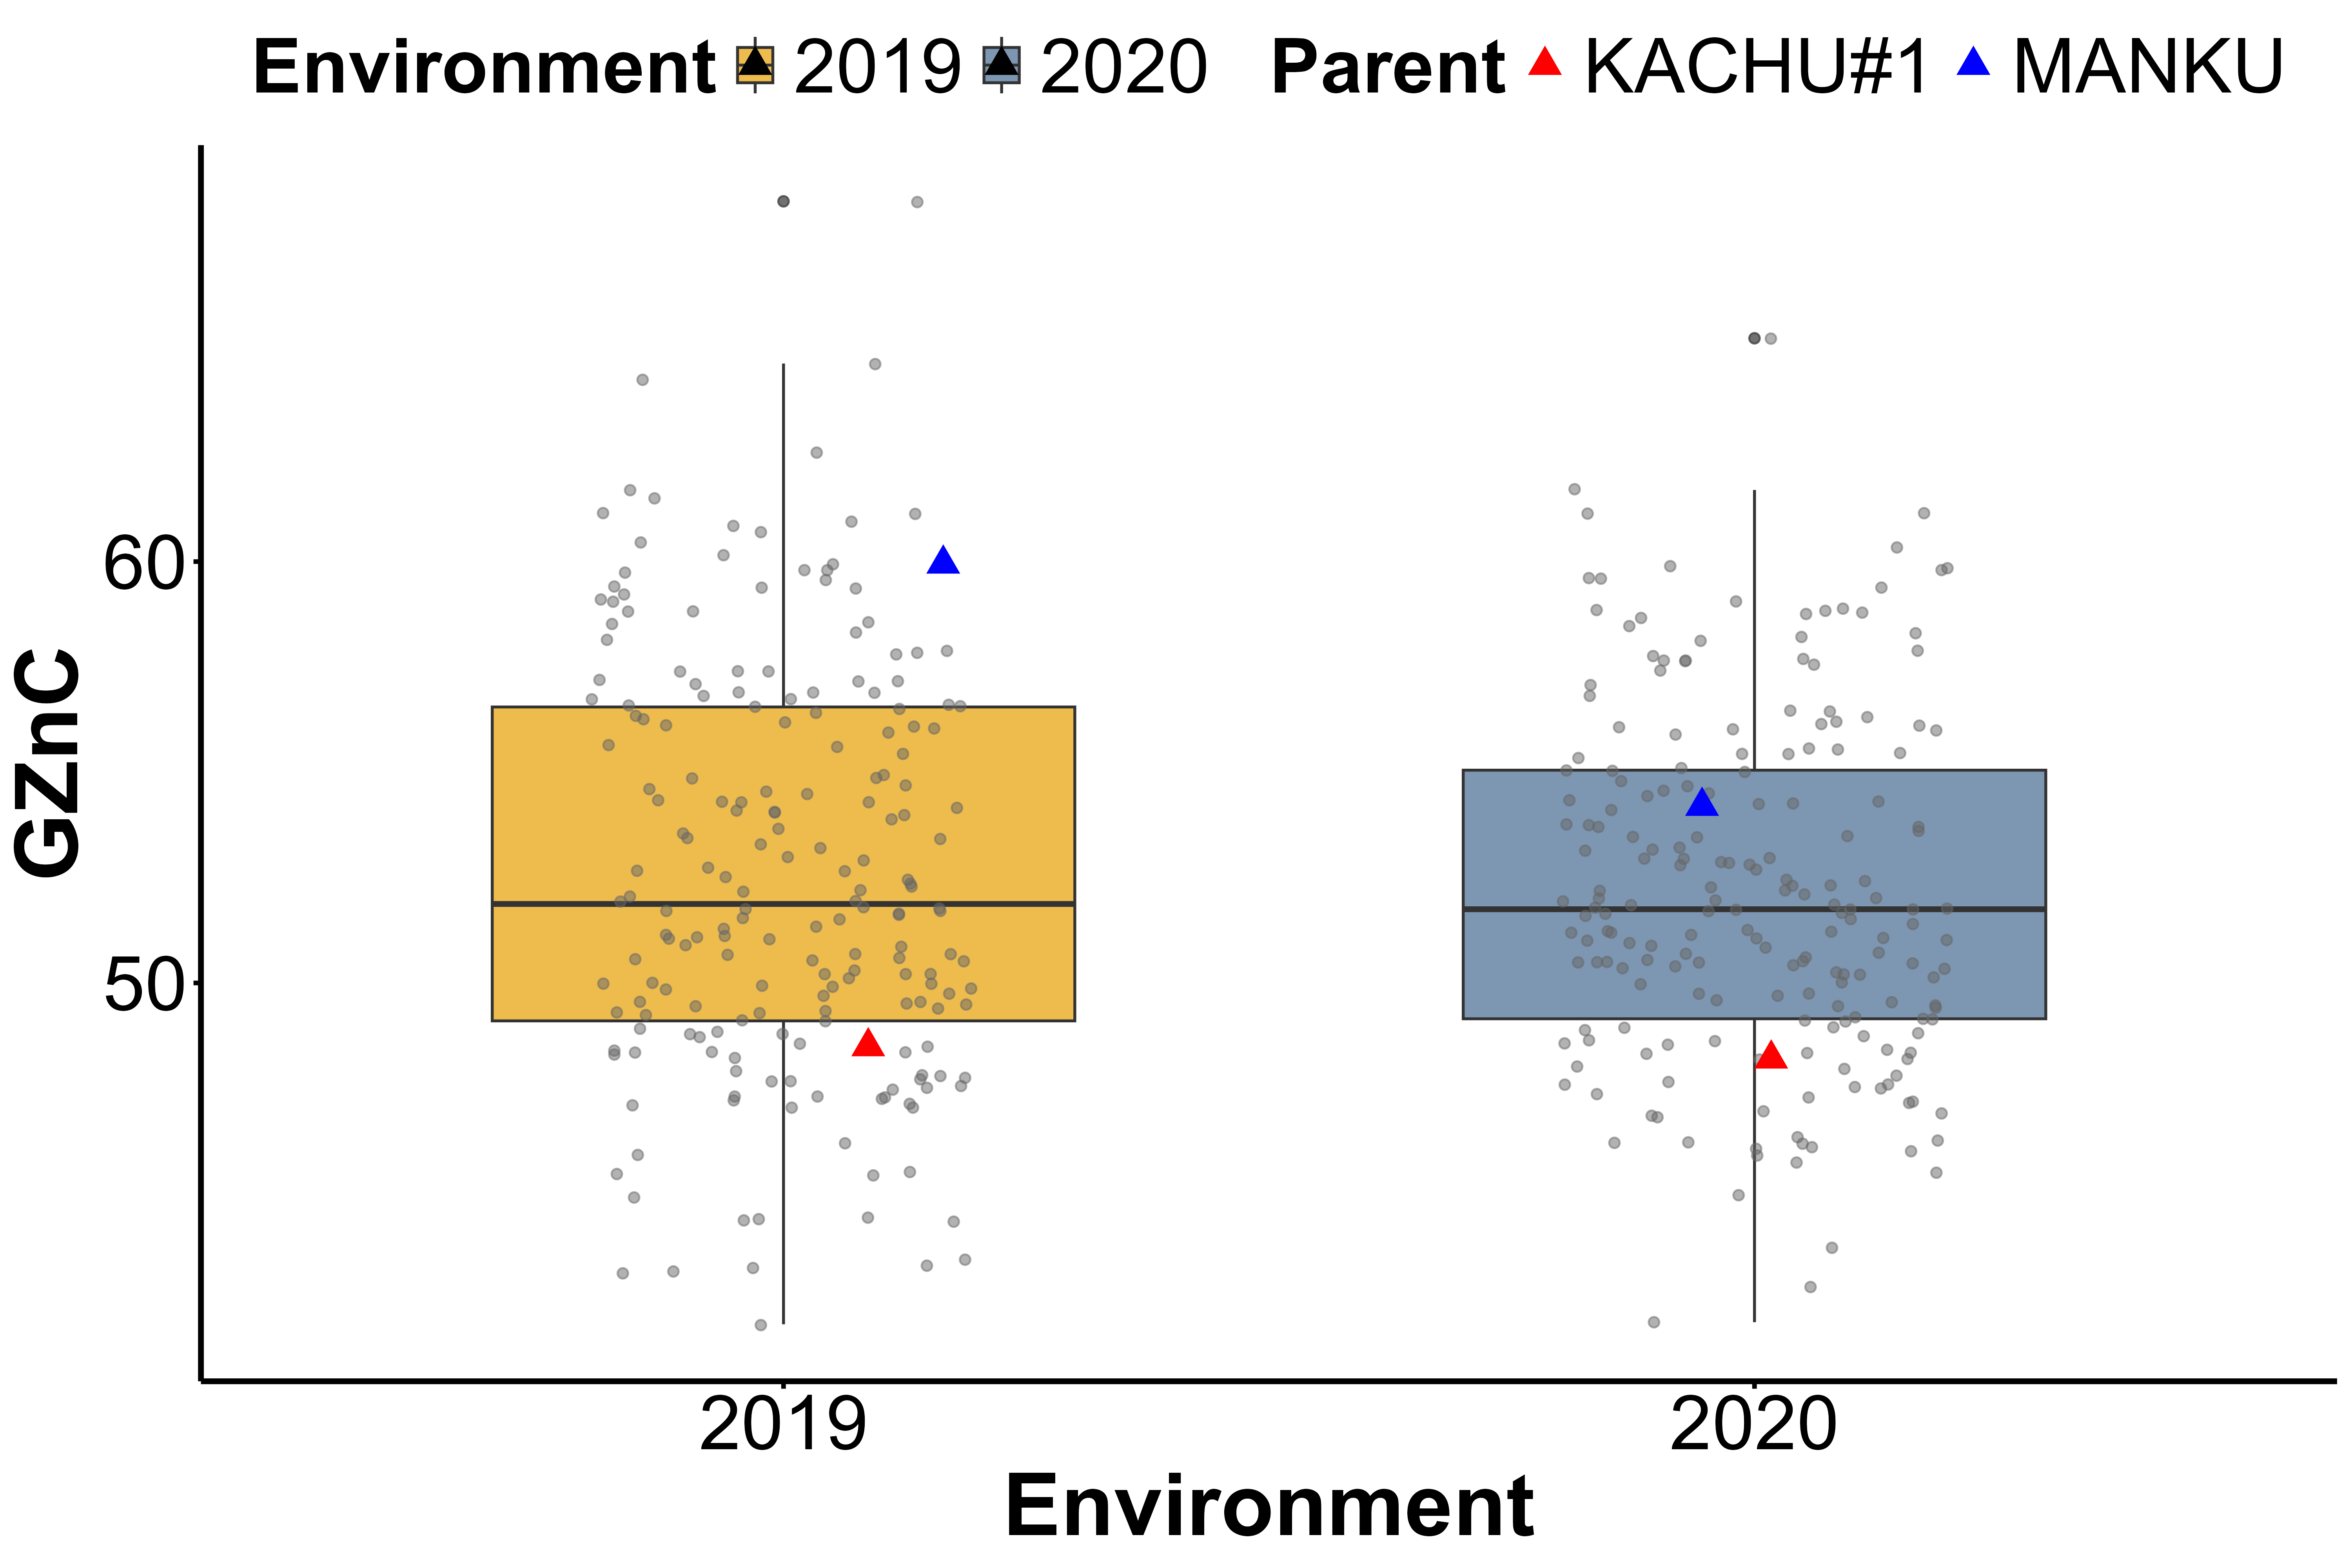

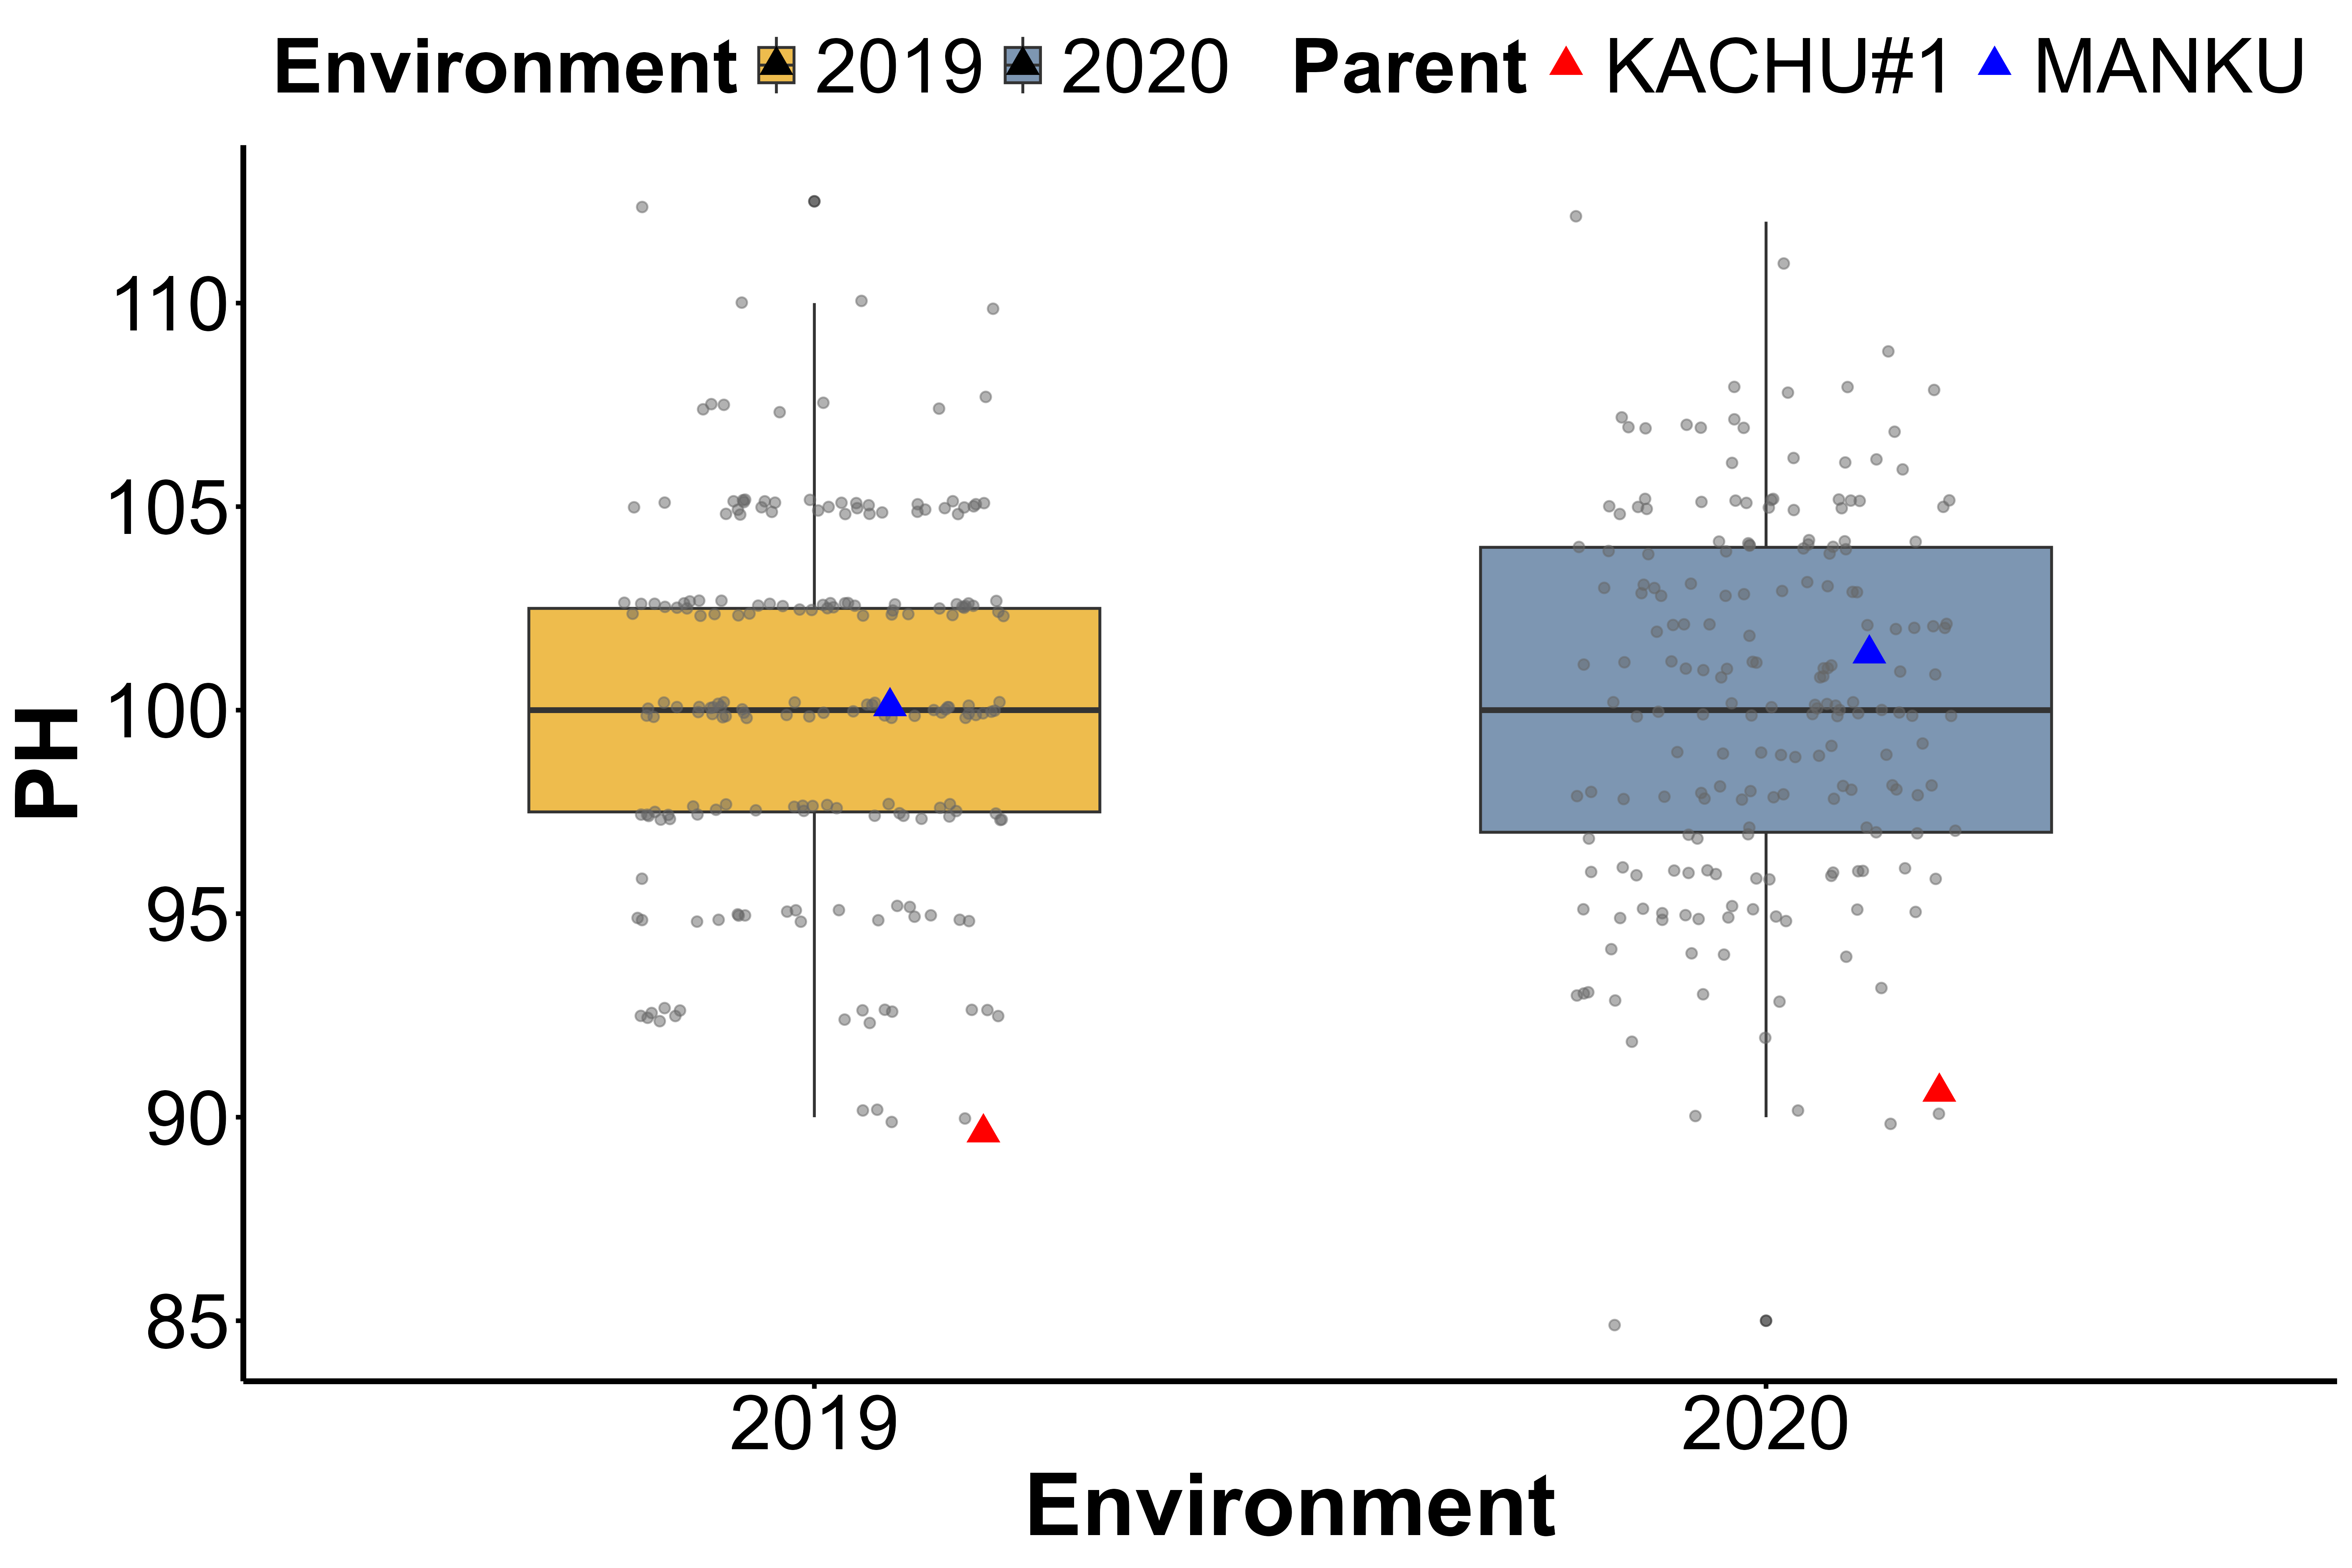

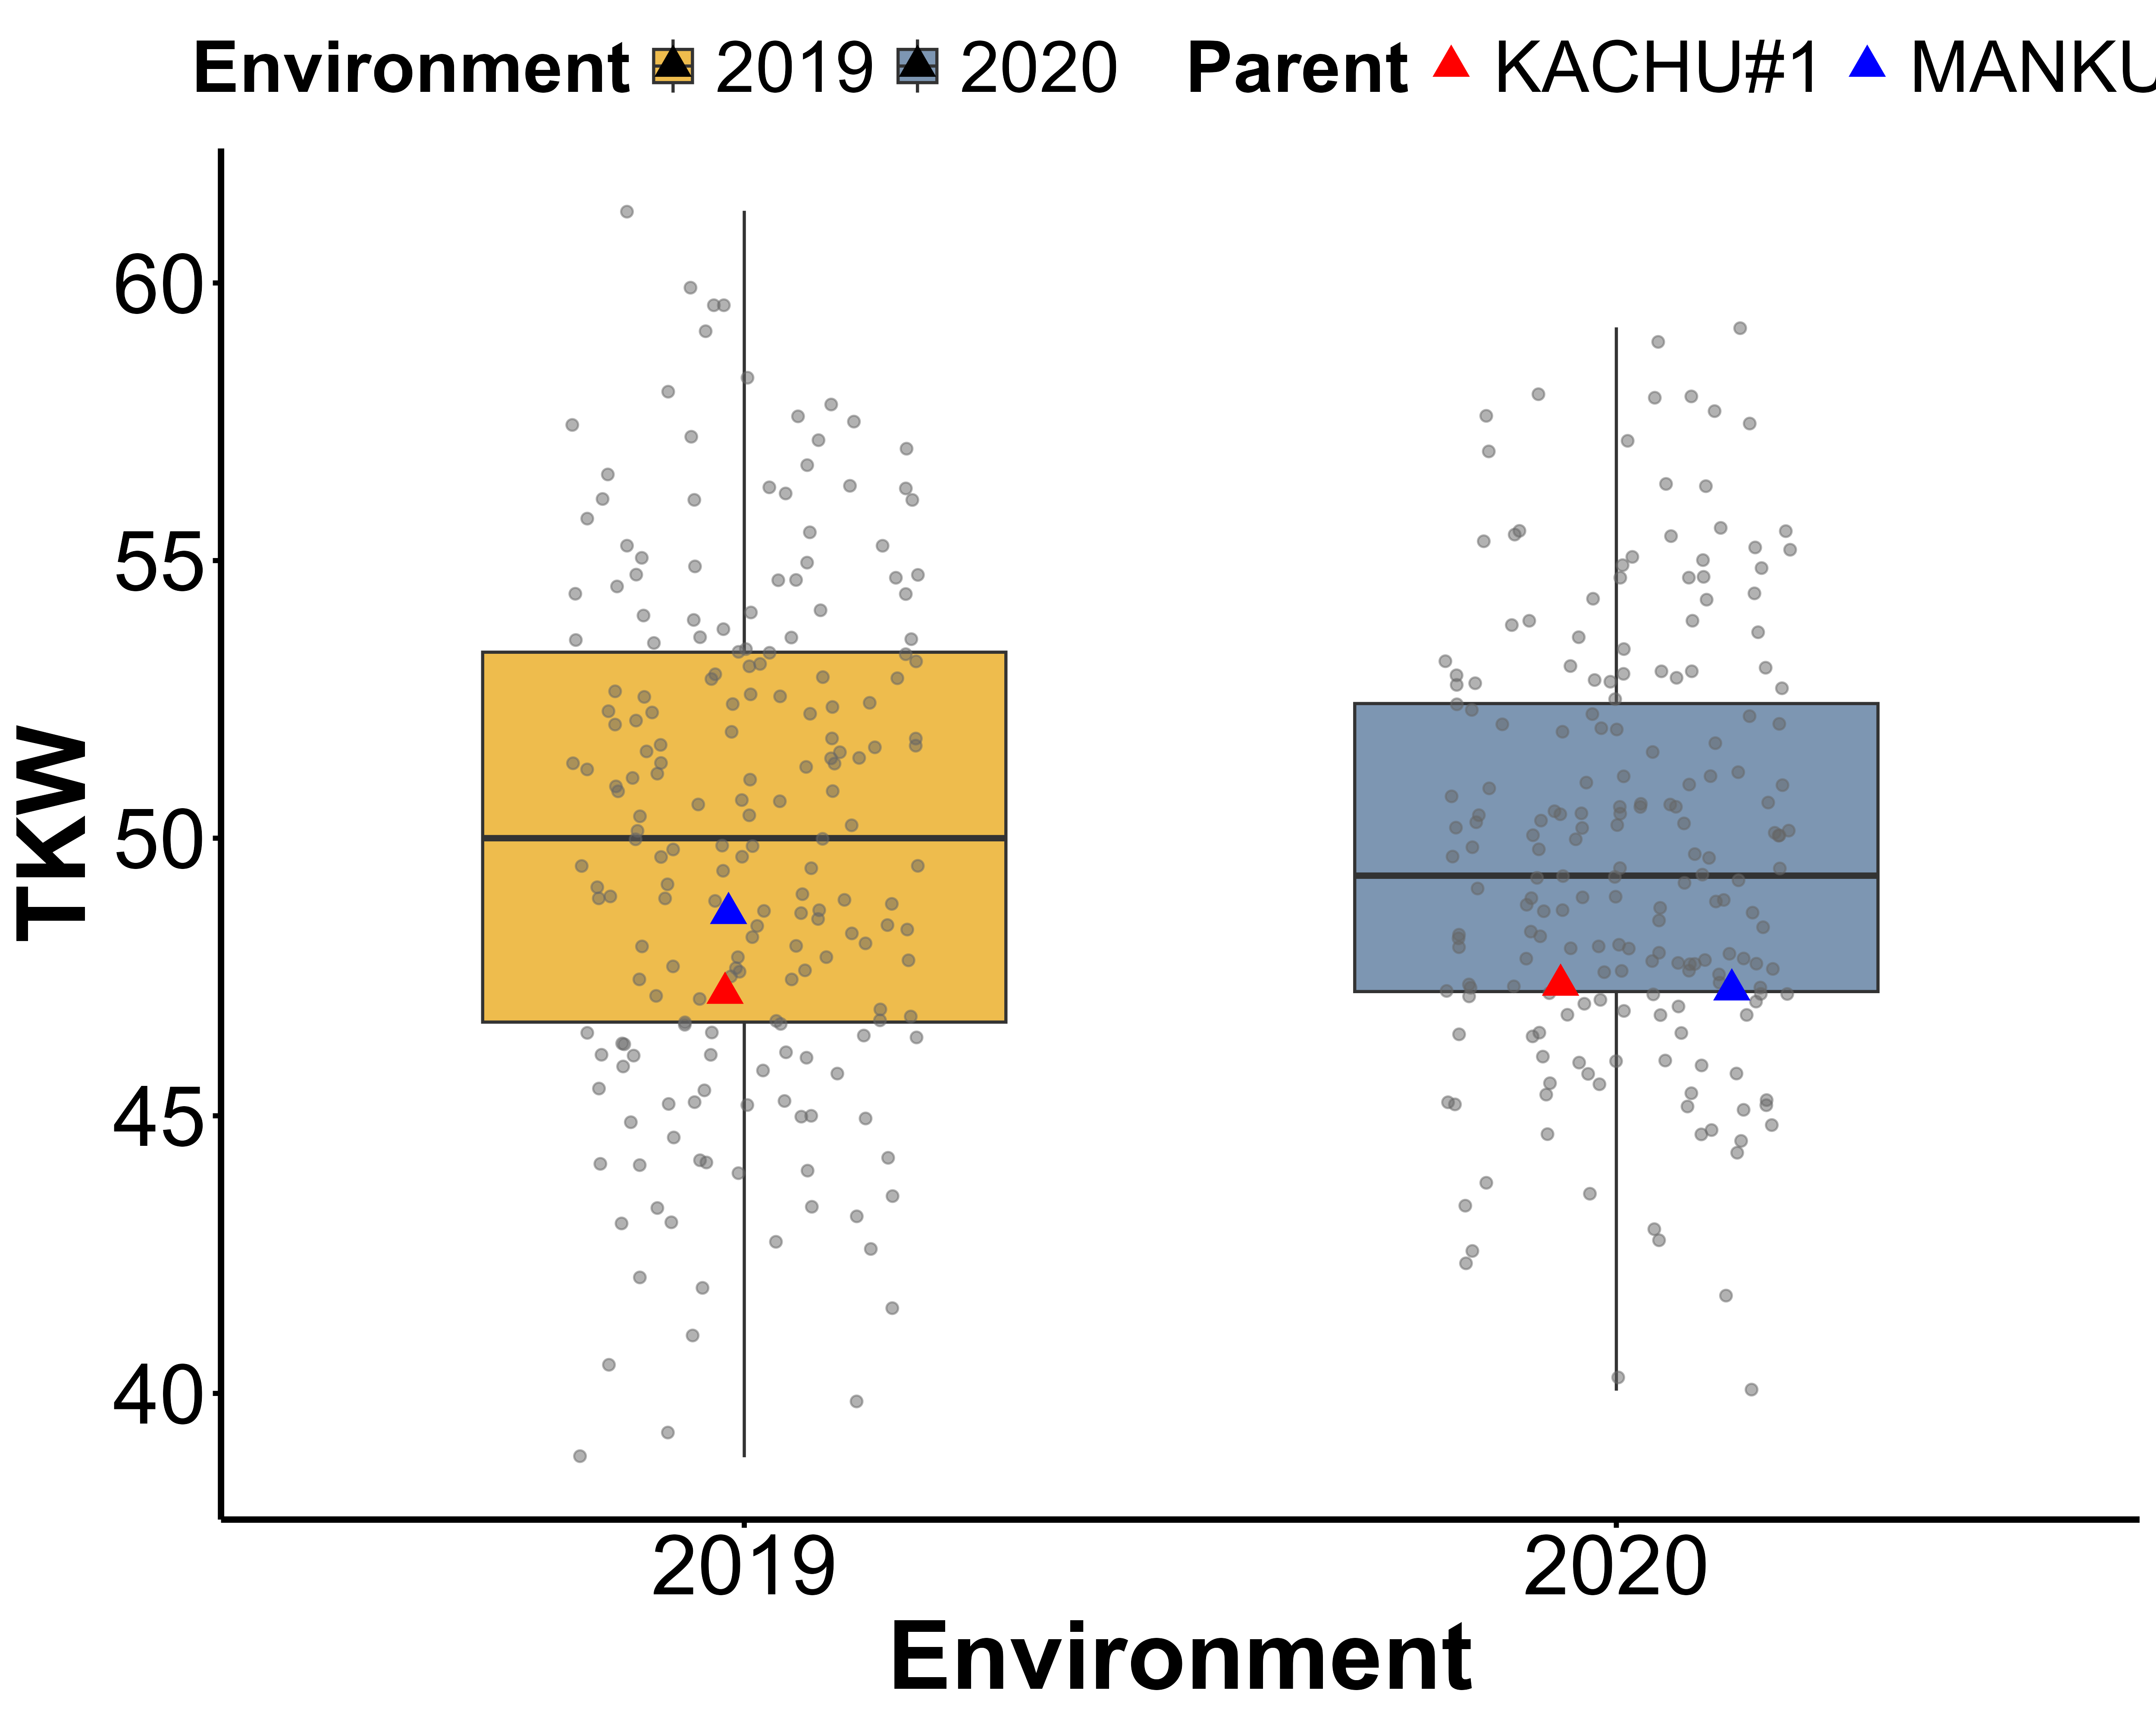

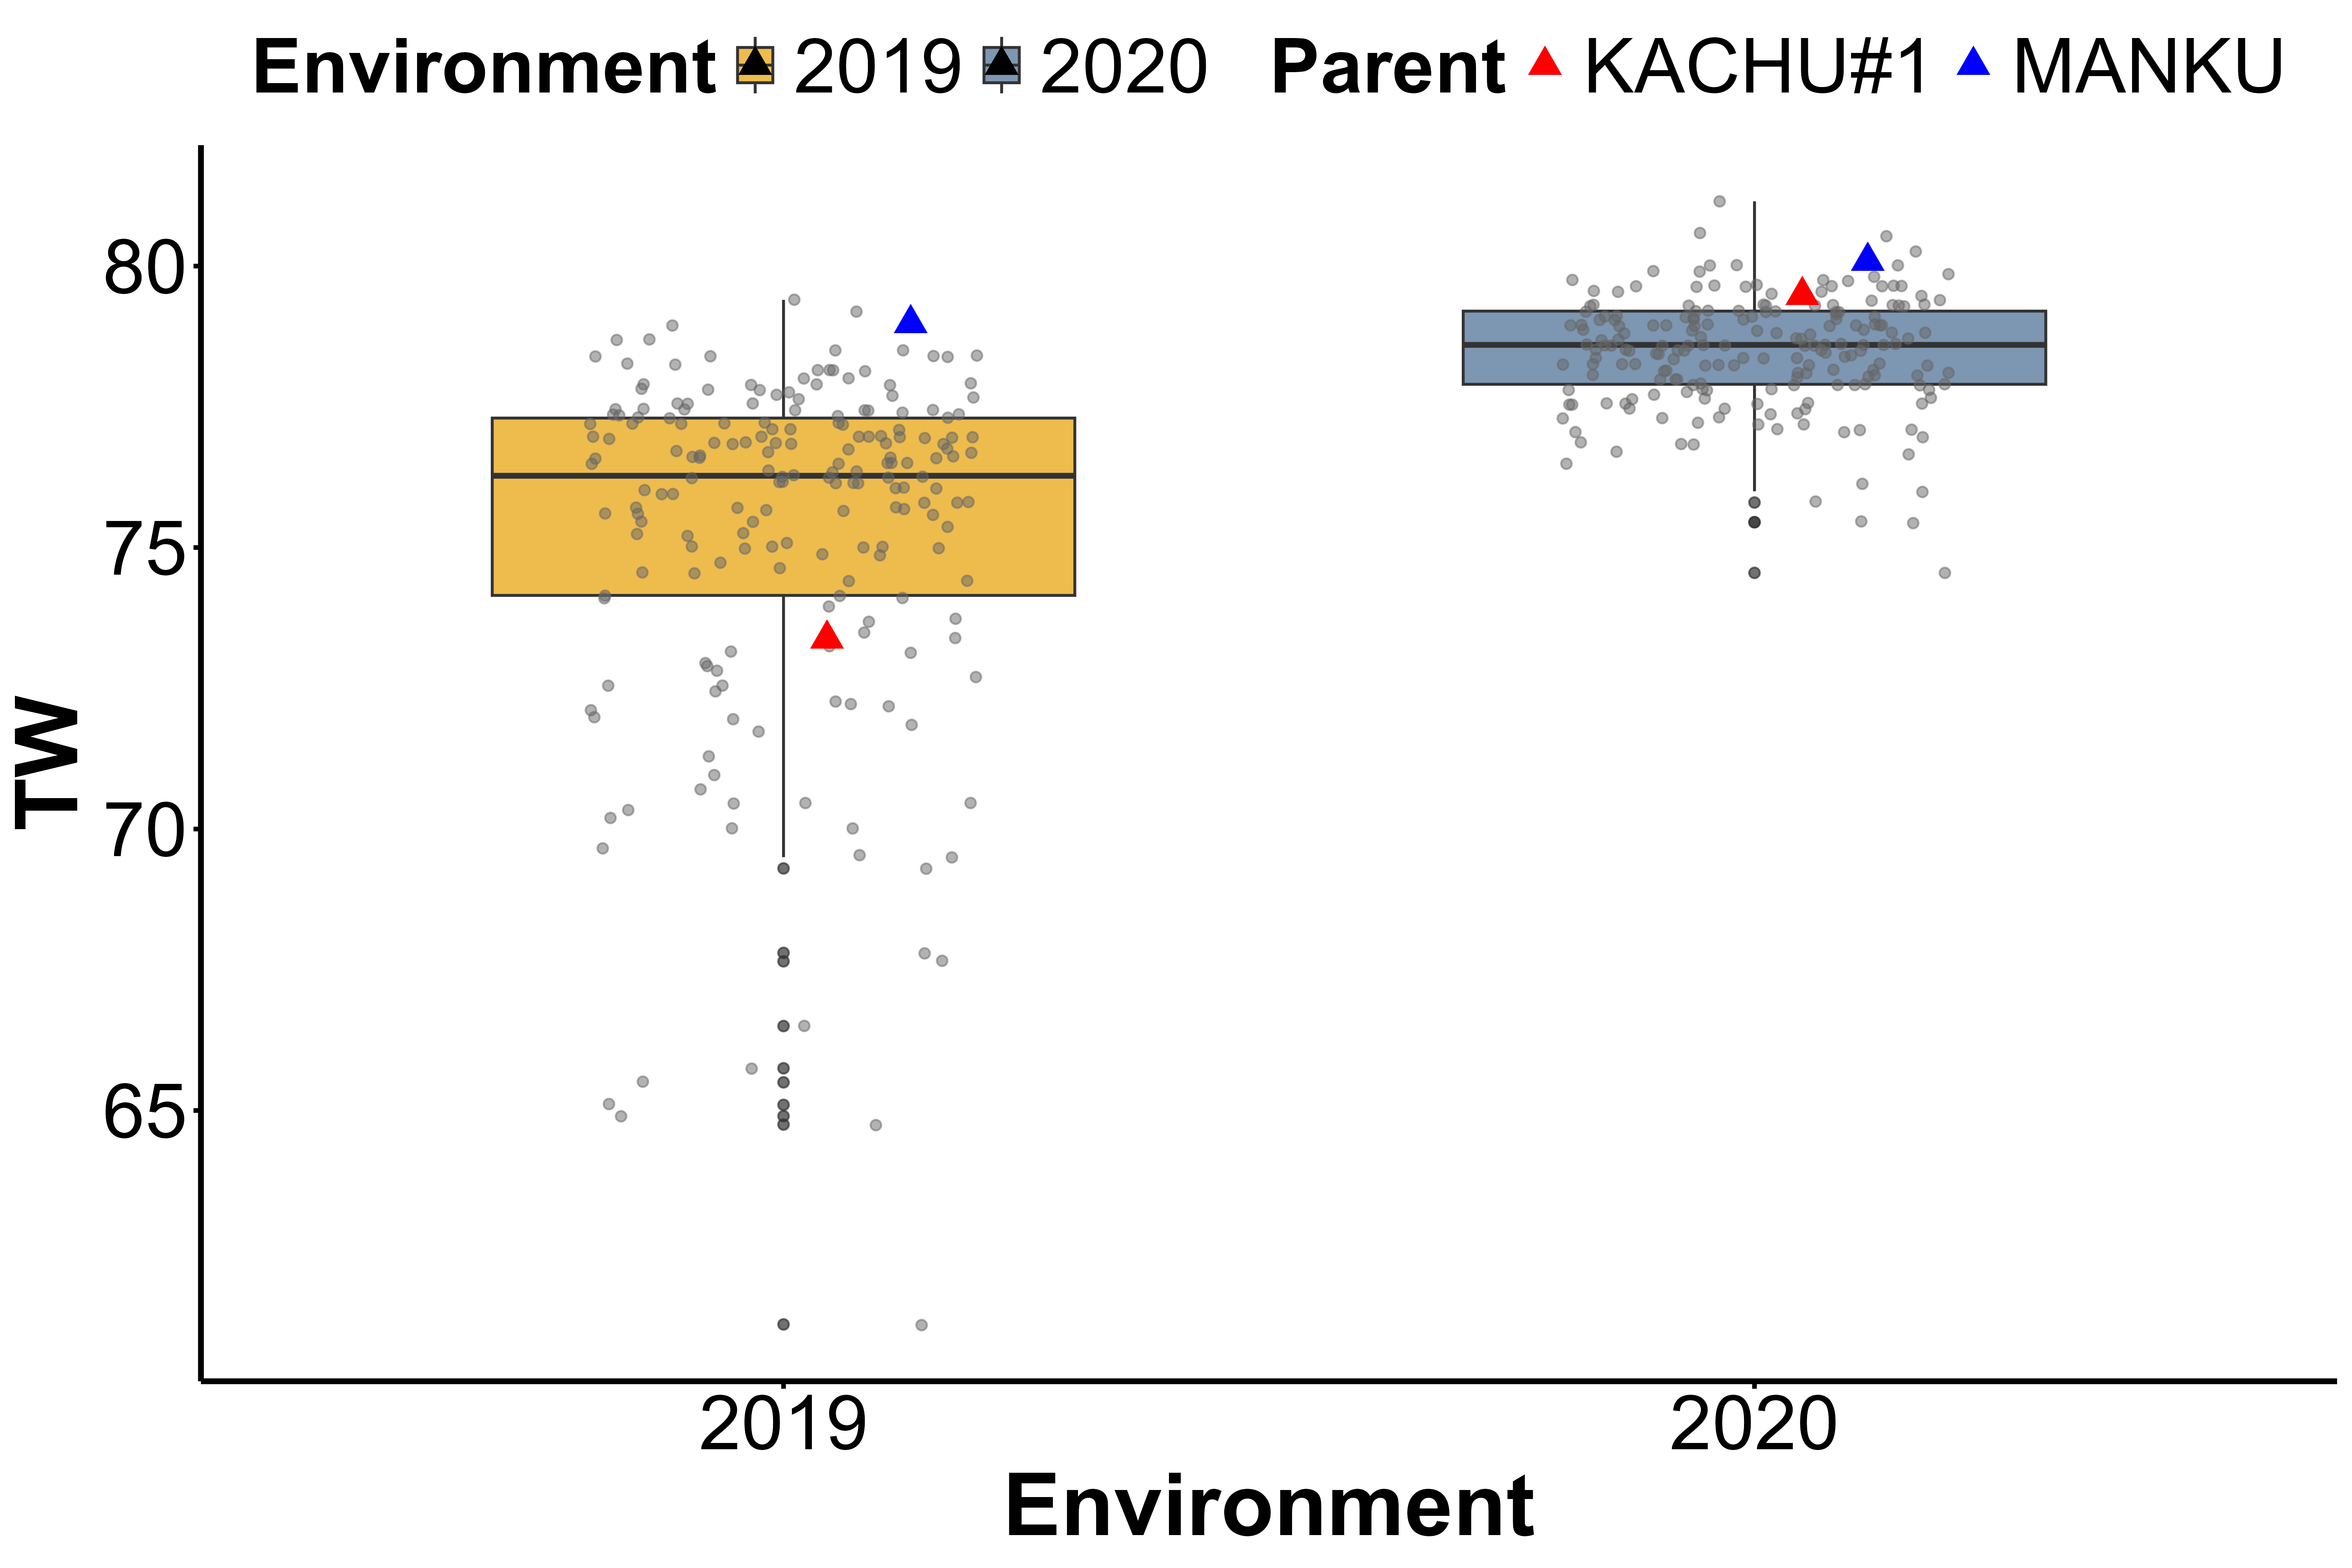


**Supplementary Figure 1**. Scatter plots showing the phenotypic distribution of six agronomic traits in the Kachu × Manku recombinant inbred line (RIL) population. Red triangles represent the phenotypic values of the parent Kachu, and blue triangles represent the phenotypic values of the parent Manku.
